# Supplementary material for: IDH2 Deficiency Promotes Endothelial Senescence by Eliciting miR-34b/c-Mediated Suppression of Mitophagy and Increased ROS Production
Source: MDPI journal article supplement (doi:10.3390/antiox12030585), 2023-02-27
Supplement: s1 [file s1]

Supplementary Table. 1

| Gene       | Forward Sequence (5'-3')  | Reverse Sequence (5'-3') | Species |
|------------|---------------------------|--------------------------|---------|
| Sirt3      | GCAGCTCCCAGTTTCTTCTTT     | CACCATGACCACCACCCTCT     | Human   |
| PINK1      | TCTAAGCCTCTGGGGTGAACA     | AGCGTTTCACACTCCAGGTT     | Human   |
| Parkin     | GTGTTTGTCAAGTTCAACTCCA    | GAAAATCACACGCAACTGGTC    | Human   |
| Sirt3      | TGCTTCTGCGGCTCTATACAC     | GGTTTCACAACGCCAGTACAG    | Mouse   |
| PINK1      | GCAATGCCGCTGTGTATGAAG     | TGGAGGAACCTGCCGAGATAT    | Mouse   |
| Parkin     | GGCTGCGGGTTTGTTTTCTG      | GGCTTGGTGGTCTTCTTGATG    | Mouse   |
| miR-34b-3p | CAATCACTAACTCCACTGCCATAA  | -                        | Human   |
| miR-34b-5p | CGCTAGGCAGTGTCATTAGCTG    | -                        | Human   |
| miR-34c-3p | CTAACCACACGGCCAGGA        | -                        | Human   |
| miR-34c-5p | CAGGCAGTGTAGTTAGCTGATTG   | -                        | Human   |
| miR-34b-3p | CACTAACTCCACTGCCATCAAA    | -                        | Mouse   |
| miR-34b-5p | GGCAGTGTAATTAGCTGATTGTAAA | -                        | Mouse   |
| miR-34c-3p | CTAACCACACAGCCAGGAAAA     | -                        | Mouse   |
| miR-34c-5p | CAGGCAGTGTAGTTAGCTGATTG   | -                        | Mouse   |

Supplementary Figure S1

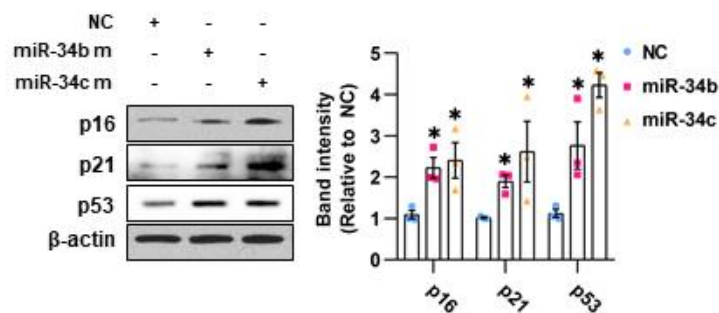

**Figure S1.** Western blot analysis of p16, p21, and p53 in HUVECs with NC or miR-34b m or miR-34c m. n≥3 per group, mean ± SEM, \*P < 0.05 compared with NC group.

# Supplementary Figure S2

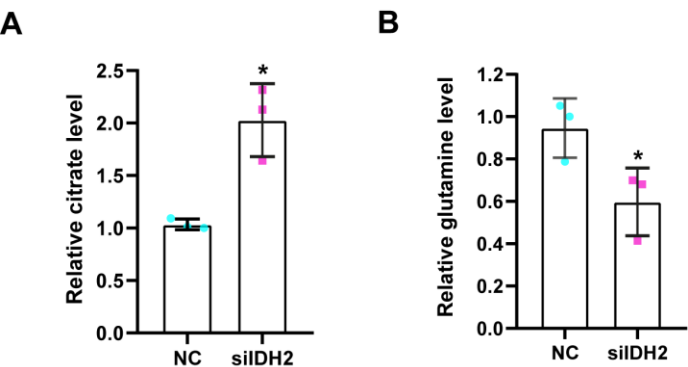

**Figure S2.** Relative intracellular levels of citrate (A), and glutamine (B) in HUVECs cells following treatment with NC or siIDH2.  $n \geq 3$  per group, mean  $\pm$  SEM, \* $P < 0.05$  compared with NC group.

Supplementary Figure S3

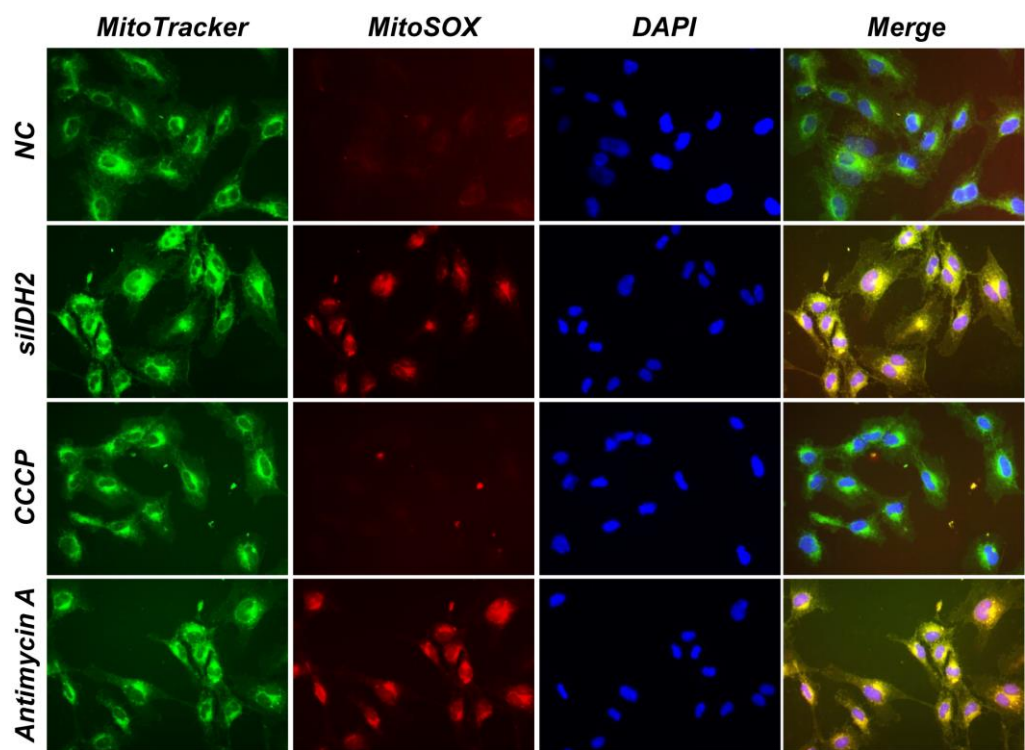

**Figure S3.** Representative micrographs of MitoTracker Green- and MitoSox Red-labeled HUVECs in the NC (Control) or siIDH2 (100 pmol) or CCCP (20  $\mu$ M, negative control) or Antimycin A (5  $\mu$ M, positive control) ; blue shows nuclei staining with DAPI.

Supplementary Figure S4

A

has-miR-34b 5' UAGGCAGUGUCAUUAGCUGAUUG 3'  
has-miR-34c 5' AGGCAGUGUAGUUAGCUGAUUGC 3'  
mmu-miR-34b 5' AGGCAGUGUAAUUAGCUGAUUGU 3'  
mmu-miR-34c 5' AGGCAGUGUAGUUAGCUGAUUGC 3'

B

|         |                                                                                             |         |                                                                                          |
|---------|---------------------------------------------------------------------------------------------|---------|------------------------------------------------------------------------------------------|
|         | 3'..AUGUGACGGA..... 5'                                                                      |         | 3'..AUGUGACGGA..... 5'                                                                   |
| human   | 5'.....GAGCTGCCTG... 3'                                                                     | human   | 5'.....GCACTGCCCG... 3'                                                                  |
| mouse   | 5'.....AGGCTGCCTT... 3'                                                                     | mouse   | 5'.....AGACTGCCCT... 3'                                                                  |
| rat     | 5'.....AGGCTGCCTT... 3'                                                                     | rat     | 5'.....ACACTGCCCC... 3'                                                                  |
| hamster | 5'.....AGGCTGCCTT... 3'                                                                     | hamster | 5'.....CTGCTGCCTG... 3'                                                                  |
|         | <div style="border-top: 1px solid black; width: 150px; margin: 0 auto;"></div> Sirt3 3'-UTR |         | <div style="border-top: 1px solid black; width: 150px; margin: 0 auto;"></div> PINK1 CDS |
|         | 3'..AUGUGACGGA..... 5'                                                                      |         |                                                                                          |
| human   | 5'.....ACACTGCCCT... 3'                                                                     |         |                                                                                          |
| mouse   | 5'.....AGACTGCCCT... 3'                                                                     |         |                                                                                          |
| rat     | 5'.....AGACTGCCTG... 3'                                                                     |         |                                                                                          |
| hamster | 5'.....AGACTGCCGT... 3'                                                                     |         |                                                                                          |
|         | <div style="border-top: 1px solid black; width: 150px; margin: 0 auto;"></div> Parkin CDS   |         |                                                                                          |

C

(716~730 bp)

WT-Sirt3-CDS 5' ....ATCCCTGCCTCAAA... 3'

miR-34b 3'.....UGUGACGGAU..... 5'

miR-34c 3'.. AUGUGACGGA..... 5'

wild type 5'.....CCCTGCCTCA..... 3'

mutation 5'..... CCTTCATCA..... 3'

D

(1414~1428 bp) (1120~1138 bp)

WT-PINK1-CDS 5' ....GCTGCTGCCTGGCT....CTGCACTGCCCGAG.. 3'

miR-34b 3'.....UGUGACGGAU..... 5'

miR-34c 3'.. ..AUGUGACGGA..... 5'

wild type 5'.....TGCTGCCTGG..... 3'

wild type 5'.....GCACTGCCCG..... 3'

mutation 5'.....TGCCGACCGG..... 3'

mutation 5'.....GTAGTCGCG..... 3'

E

(951~968 bp) (955~969 bp)

WT-Parkin-CDS 5' ....CCCCACACTGCCCTGG....CTCCCTGCCTTGTG... 3'

miR-34b 3'.....UGUGACGGAU..... 5'

miR-34c 3'.. AUGUGACGGA..... 5'

wild type 5'.....CCCTGCCTTG..... 3'

wild type 5'.....ACACTGCCCT..... 3'

mutation 5'..... CCCCGACCTG..... 3'

mutation 5'.....CCCCGGACCT..... 3'

**Figure S4.** (A) Sequence and seed site of human and mouse miR-34b/c. (B) Representative mode of miR-34b/c targeting the 3'-UTR or CDS region of Sirt3, PINK1, and Parkin. (C, D, E) Sequence mutation sites of Sirt3, PINK1, and Parkin CDS region.
